# Supplementary material for: Inducer-independent production of pectinases in Aspergillus niger by overexpression of the D-galacturonic acid-responsive transcription factor gaaR
Source: PubMed Central journal article supplement (PMC5847190; doi:10.1007/s00253-018-8753-7), 2018-01-24
Supplement: 253_2018_8753_MOESM1_ESM.pdf [file 253_2018_8753_MOESM1_ESM.pdf]

**ESM\_1** Strains used in this study

| Strain  | Accession Number | Genotype                                                                                                                              | Description                               | Reference         |
|---------|------------------|---------------------------------------------------------------------------------------------------------------------------------------|-------------------------------------------|-------------------|
| N402    | ATCC 64974       | <i>cspA1</i>                                                                                                                          | Derivative of NRRL3 (N400)                | Bos et al. 1988   |
| MA234.1 | CBS 141255       | <i>cspA1, kusA::DR-amdS-DR</i>                                                                                                        | Restored <i>pyrG</i> in MA169.4           | Alazi et al. 2016 |
| XY1.1   | CBS 143276       | <i>cspA1, creA::pyrG</i>                                                                                                              | $\Delta creA$ in AB4.1                    | Yuan et al. 2006  |
| MA342.2 | CBS 143258       | <i>cspA1, kusA::DR-amdS-DR, creA::hygB</i>                                                                                            | $\Delta creA$ in MA234.1                  | This study        |
| JN35.1  | CBS 141256       | <i>cspA1, kusA::DR-amdS-DR, gaaR::hygB</i>                                                                                            | $\Delta gaaR$ in MA234.1                  | Alazi et al. 2016 |
| JN36.1  | CBS 143259       | <i>cspA1, gaaR::hygB</i>                                                                                                              | <i>amdS</i> loopout in JN35.1             | Alazi et al. 2016 |
| EA21.3  | CBS 143260       | <i>cspA1, gaaR::hygB, amdS<sup>+</sup>, ectopically integrated PgpdA-gaaR</i>                                                         | <i>gaaR</i> overexpression in JN36.1      | This study        |
| EA21.5  | CBS 143261       | <i>cspA1, gaaR::hygB, amdS<sup>+</sup>, ectopically integrated PgpdA-gaaR</i>                                                         | <i>gaaR</i> overexpression in JN36.1      | This study        |
| EA21.6  | CBS 143262       | <i>cspA1, gaaR::hygB, amdS<sup>+</sup>, ectopically integrated PgpdA-gaaR</i>                                                         | <i>gaaR</i> overexpression in JN36.1      | This study        |
| EA21.8  | CBS 143263       | <i>cspA1, gaaR::hygB, amdS<sup>+</sup>, ectopically integrated PgpdA-gaaR</i>                                                         | <i>gaaR</i> overexpression in JN36.1      | This study        |
| TK1.1   | CBS 143264       | <i>cspA1, gaaR::hygB, amdS<sup>+</sup>, ectopically integrated PgpdA-gaaR</i>                                                         | <i>gaaR</i> overexpression in JN36.1      | This study        |
| EA23.6  | CBS 143265       | <i>cspA1, gaaR::hygB, amdS<sup>+</sup>, ectopically integrated PgpdA-gaaR, pyrE<sup>-</sup></i>                                       | Loss of <i>pyrE</i> in EA21.6             | This study        |
| TK2.1   | CBS 143266       | <i>cspA1, gaaR::hygB, amdS<sup>+</sup>, ectopically integrated PgpdA-gaaR, pyrE<sup>-</sup>, <math>\Delta creA::pyrF</math></i>       | $\Delta creA$ in EA23.6                   | This study        |
| EA19.2  | CBS 143267       | <i>cspA1, gaaR::hygB, amdS<sup>+</sup>, ectopically integrated P<sub>gaaR</sub>-eGFP-gaaR</i>                                         | <i>eGFP-gaaR</i> in JN36.1                | This study        |
| EA20.10 | CBS 143268       | <i>cspA1, gaaR::hygB, amdS<sup>+</sup>, ectopically integrated PgpdA-eGFP-gaaR</i>                                                    | <i>eGFP-gaaR</i> overexpression in JN36.1 | This study        |
| JN126.2 | CBS 143269       | <i>cspA1, <math>\Delta ku70::amdS</math>, <math>gaaX::nicB</math>, P<sub>gaaX-gaaX</sub>-eGFP integrated to the <i>pyrG</i> locus</i> | <i>gaaX-eGFP</i> in JN125.1               | Niu et al. 2017   |
| MA26.1  | CBS 143270       | <i>cspA1, amdS<sup>-</sup>, PgpdA-H2B-eGFP</i>                                                                                        | <i>H2B-eGFP</i> overexpression in AB4.1   | Vinck, 2007       |
| JC1.5   | CBS 143271       | <i>cspA1, <math>\Delta ku70</math>, PNRRL3_03144-<i>amdS</i> integrated to the <i>pyrG</i> locus</i>                                  | PNRRL3_03144- <i>amdS</i> in MA299.2      | Niu et al. 2015   |
| JN29.2  | CBS 143272       | <i>cspA1, <math>\Delta ku70</math>, PNRRL3_03144-<i>amdS</i> integrated to the <i>pyrG</i> locus, <i>creA::hygB</i></i>               | $\Delta creA$ in JC1.5                    | Niu et al. 2015   |
| JC3.6   | CBS 143273       | <i>cspA1, <math>\Delta ku70</math>, P<sub>pgx28B</sub>-<i>amdS</i> integrated to the <i>pyrG</i> locus</i>                            | <i>P<sub>pgx28B</sub>-amdS</i> in MA299.2 | Niu et al. 2015   |
| JN31.3  | CBS 143274       | <i>cspA1, <math>\Delta ku70</math>, P<sub>pgx28B</sub>-<i>amdS</i> integrated to the <i>pyrG</i> locus, <i>creA::hygB</i></i>         | $\Delta creA$ in JC3.6                    | Niu et al. 2015   |
| JN123.1 | CBS 143275       | <i>cspA1, <math>\Delta ku70</math>, PNRRL3_03144-<i>amdS</i> integrated to the <i>pyrG</i> locus, <i>gaaX::hygB</i></i>               | $\Delta gaaX$ in JC1.5                    | Niu et al. 2017   |

## ESM\_2 Primers used in this study.

| Primer name        | Sequence (5' to 3')                                                      | Used for                                                            | Remarks                               |
|--------------------|--------------------------------------------------------------------------|---------------------------------------------------------------------|---------------------------------------|
| gaaR comp P1 PscI  | CATG <u>ACATG</u> CCCCCCCCAGGT                                           | amplification of <i>gaaR</i> for the construction of pEA4           | <i>PscI</i> site underlined           |
| gaaR comp P2 BgIII | GA <u>AGATCT</u> CAAGGATTCTCCACCTCCA                                     | amplification of <i>gaaR</i> for the construction of pEA4           | <i>BgIII</i> site underlined          |
| gaaR SBfor         | CCTCGACGCCATTCCAGTT                                                      | amplification of Southern blot probe                                |                                       |
| gaaR SBrev         | GGTCATGGACACCGCATTG                                                      | amplification of Southern blot probe                                |                                       |
| gaaR comp P1       | <b>ATGTC</b> CCGCCCCAGGT                                                 | amplification of <i>gaaR</i> for the construction of pEA2 and pEA3  | Fusion PCR overlapping region in bold |
| gaaR comp P2 BgIII | GA <u>AGATCT</u> CAAGGATTCTCCACCTCCA                                     | amplification of <i>gaaR</i> for the construction of pEA2 and pEA3  | <i>BgIII</i> site underlined          |
| eGFP P1 NcoI       | GATG <u>CCATGGT</u> GAGCAAGGGCGAG                                        | amplification of <i>eGFP</i> for the construction of pEA2 and pEA3  | <i>NcoI</i> site underlined           |
| eGFP P2 gaaR phu   | <b>CTGACCTGGGGCGGGACAT</b> CTTGACAGCTCGTCCATG                            | amplification of <i>eGFP</i> for the construction of pEA2 and pEA3  | Fusion PCR overlapping region in bold |
| PgaaR P1 NotI      | AAGGAAAAAG <u>CGGGCCG</u> CTGGGATTGAAGATGTCGATGC                         | amplification of <i>PgaaR</i> for the construction of pEA2          | <i>NotI</i> site underlined           |
| PgaaR P2 NcoI      | CATG <u>CCATGG</u> CATTGCCTGTGCATAGG                                     | amplification of <i>PgaaR</i> for the construction of pEA2          | <i>NcoI</i> site underlined           |
| creA sm p1f        | AAGCAGCCGATCTGGTCAA                                                      | amplification of <i>creA</i> 5' flank to create TK2.1               |                                       |
| creA sm p2r        | <b>CAATTCAGCAGCGGCTT</b> GTGAAGCTTGCCCAAGAC                              | amplification of <i>creA</i> 5' flank to create TK2.1               | Fusion PCR overlapping region in bold |
| creA sm p3f        | <b>ACACGGCACAATTATCCATCG</b> TTCGAACATTCTTCAGCCACAC                      | amplification of <i>creA</i> 3' flank to create TK2.1               | Fusion PCR overlapping region in bold |
| creA sm p4r        | GGGAATGGTCTGGTCTCCGT                                                     | amplification of <i>creA</i> 3' flank to create TK2.1               |                                       |
| Anid pyrFP1for     | <b>AAGCCGCTGCTGGAATTG</b> ACTGATTGCGC ACATTGAC                           | amplification of <i>A. nidulans pyrF</i> fragment 1 to create TK2.1 | Fusion PCR overlapping region in bold |
| Anid pyrFP4rev     | CGCCTCCTTCTCGATGAT                                                       | amplification of <i>A. nidulans pyrF</i> fragment 1 to create TK2.1 |                                       |
| Anid pyrFP3for     | GCCGTGAATCGCCCTACTT                                                      | amplification of <i>A. nidulans pyrF</i> fragment 2 to create TK2.1 |                                       |
| Anid pyrFP2rev     | <b>CGATGGATAATTGTGCCGTG</b> ATCAGGCACGGTCAGTCCTC                         | amplification of <i>A. nidulans pyrF</i> fragment 2 to create TK2.1 | Fusion PCR overlapping region in bold |
| An02g03830P1f_KIT  | AGTATTCCACTCAGCTCTGGACTAACCTCTTTAATTCTACTCCG<br>TAATCCCTCTCGAC           | amplification of <i>creA</i> 5' flank to create MA342.2             |                                       |
| An02g03830P2r_KIT  | TGATGTGTGTGACGTGATGTGTATATCCTATCCAAGACCGAC<br>GAGGGTAAAA                 | amplification of <i>creA</i> 5' flank to create MA342.2             |                                       |
| An02g03830P3f_KIT  | TGATGATGGATATATGGAAGCTGGAGGATGTTCGAACATTCT<br>TCAGCCACACGTTG             | amplification of <i>creA</i> 3' flank to create MA342.2             |                                       |
| An02g03830P4r_KIT  | TAGCAGGTGAGAACTCACTTGTACTCGACTCCTGCATACTGGT<br>ATATACAGTAAAACCCCATACTATC | amplification of <i>creA</i> 3' flank to create MA342.2             |                                       |
| An02g03830P5f_KIT  | ACACCCTCTTCCCGGTCA                                                       | amplification of split marker fragment 5' to create MA342.2         |                                       |
| An02g03830P6r_KIT  | AGTCAATCAAGTAAGTCCCC                                                     | amplification of split marker fragment 3' to create MA342.2         |                                       |
| hygP3f             | TAGGATATACATCACGTC                                                       | amplification of <i>hygR</i> selection marker                       |                                       |
| hygP4r             | CATCCTCCAGTTCATATATC                                                     | amplification of <i>hygR</i> selection marker                       |                                       |

hygP8f

AAAGTTCGACAGCGTCTCC

amplification of split marker fragment 3' to create MA342.2

hygP9r

GGCGTCGGTTTCCACTATC

amplification of split marker fragment 5' to create MA342.2

---

ESM\_3 Supplementary figures

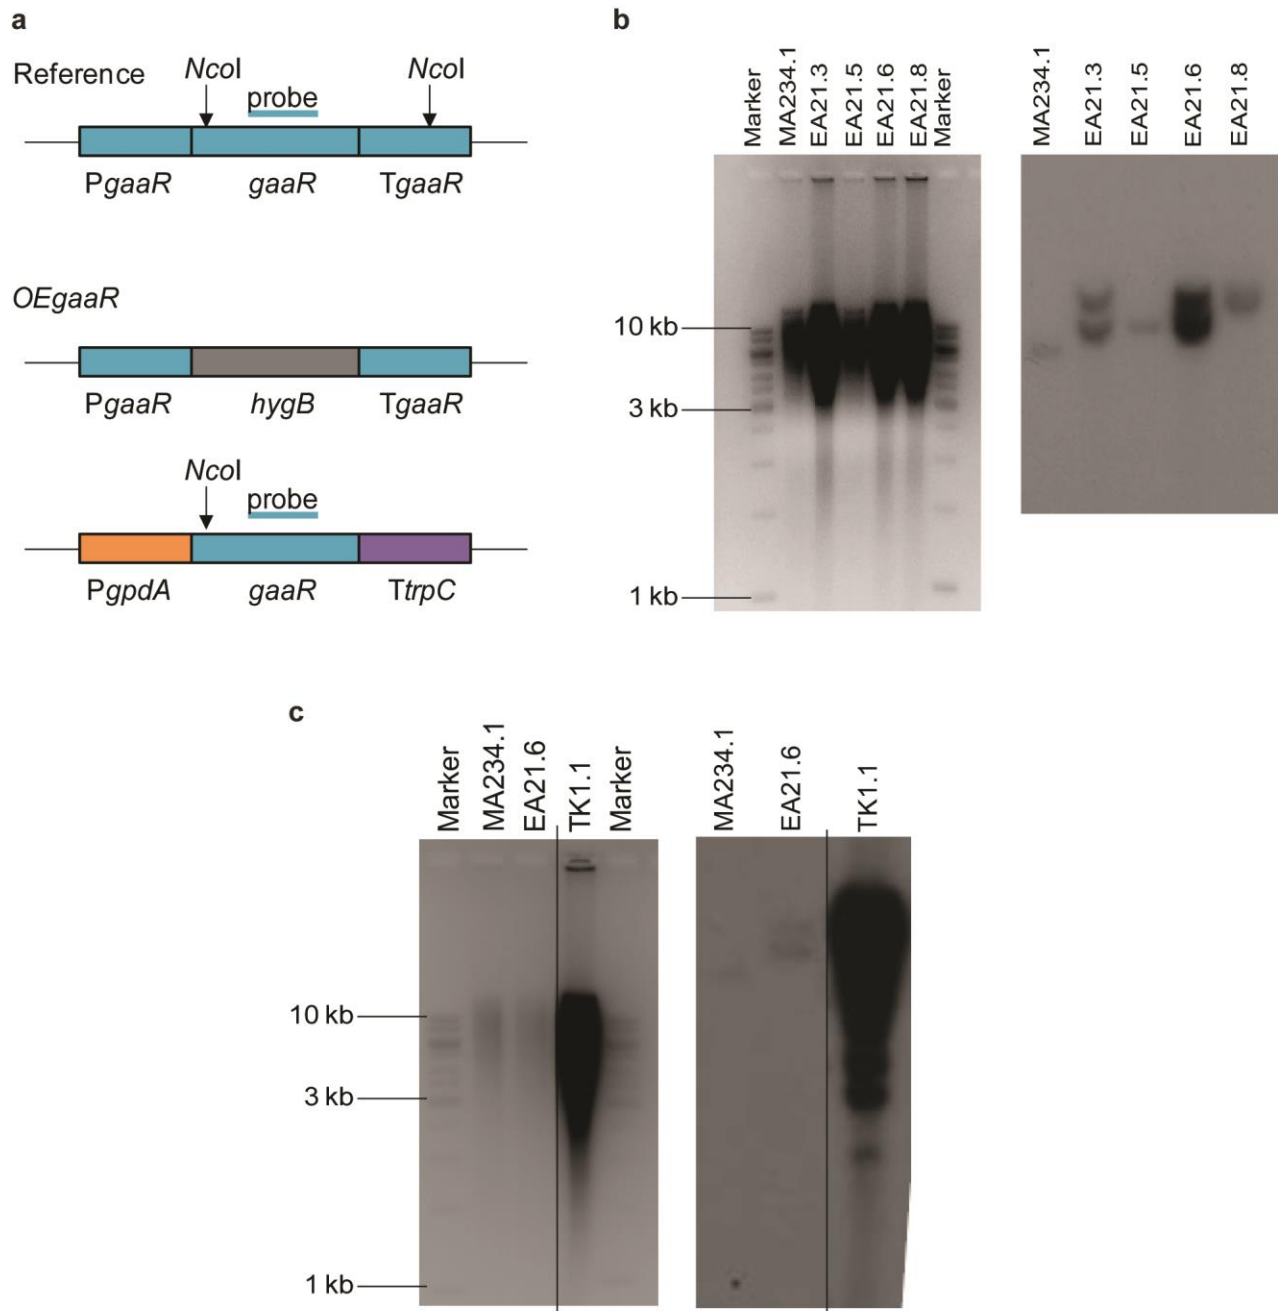

**Fig ESM\_3.1** Verification of the ectopic integration of the *PgpdA-gaaR-TtrpC* construct in EA21.3, EA21.5, EA21.6 and EA21.8 via Southern blot analysis of genomic DNA. **a** Schematic representation of the target gene locus in the reference (MA234.1) and *OEgaaR* (EA21.3, EA21.5, EA21.6, EA21.8 and TK1.1) strains. The probe binds to *gaaR* downstream of the *NcoI* restriction site. **b** Agarose gel stained with ethidium bromide and Southern blot after hybridization for MA234.1, EA21.3, EA21.5, EA21.6 and EA21.8 strains. **c** Agarose gel stained with ethidium bromide and Southern blot after hybridization for MA234.1, EA21.6 and TK1.1 strains. The line between genomic DNA samples indicate that left and right parts of the same blot were combined, removing unnecessary lanes. A 4698 bp band is visible in the case of the

reference strain and bands with different sizes are visible in the case of the *OEgaaR* strains depending on the integration site of the *gaaR* overexpression construct in their genomes

a

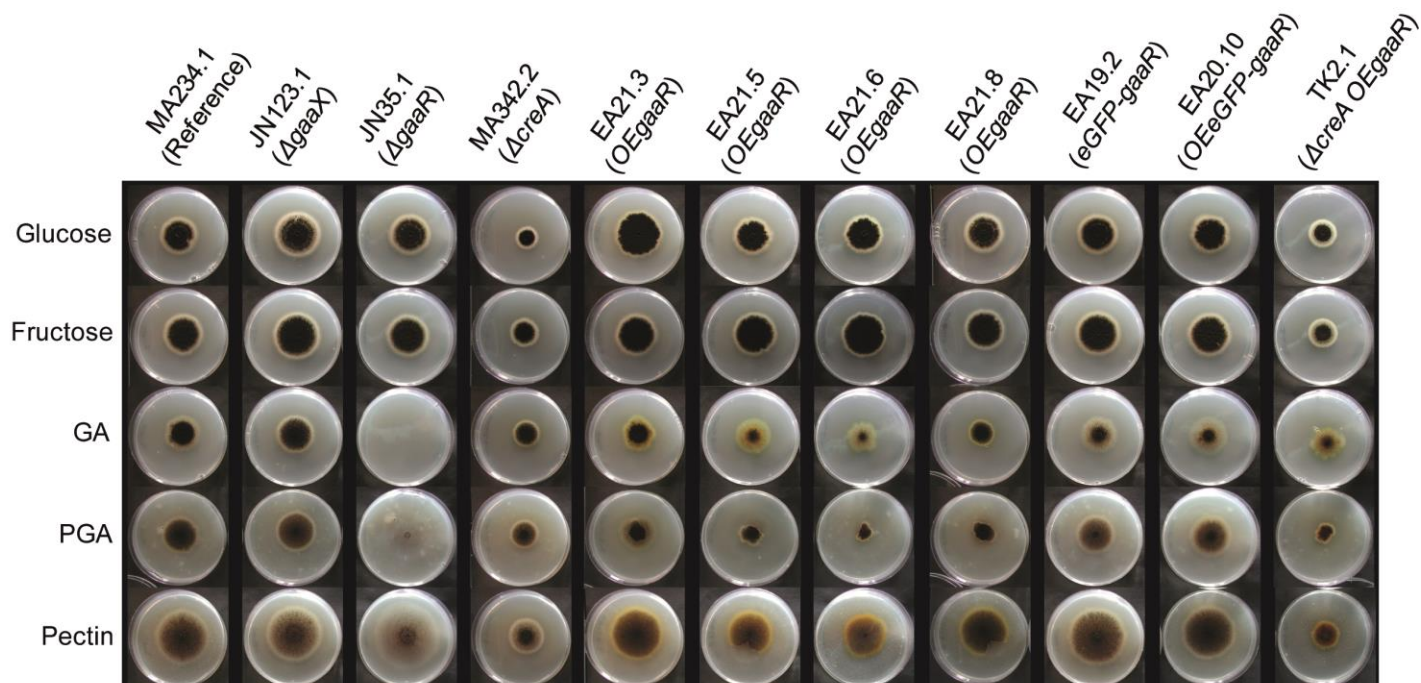

b

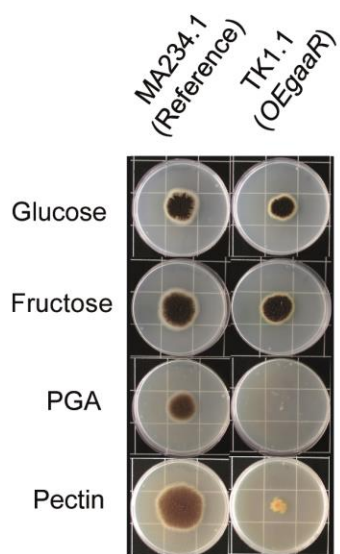

**Fig ESM\_3.2** Radial growth assay on solid MM containing 50 mM monomeric or 1% polymeric carbon sources after 7 days at 30 °C

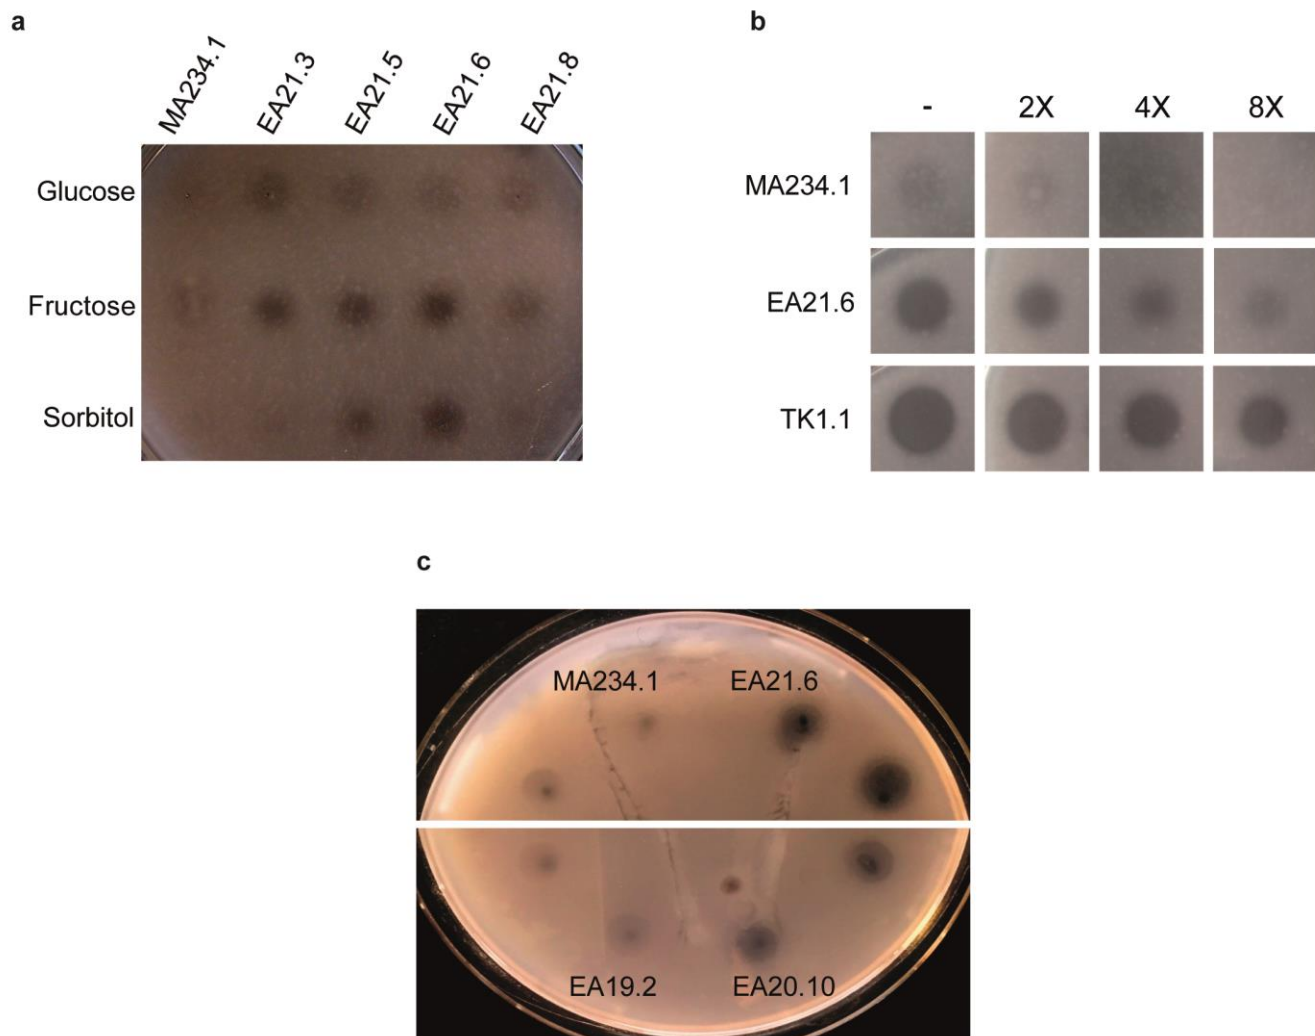

**Fig ESM\_3.3** PGA plate assay. The reference (MA234.1), *OEgaaR* (EA21.3, EA21.5, EA21.6, EA21.8 and TK1.1), *eGFP-gaaR* (EA19.2) and *OEEgFP-gaaR* (EA20.10) strains were grown in liquid medium for 36 h and supernatant from each culture was spotted on PGA plates. **a** Strains were grown in MM containing 50 mM glucose, fructose or sorbitol. **b** Strains were grown in MM containing 50 mM fructose, and serial dilutions of culture supernatants were spotted. Dilution factors are indicated. **c** Strains were grown in MM containing 50 mM fructose. Enzymatic activity in the supernatants from duplicate cultures are shown

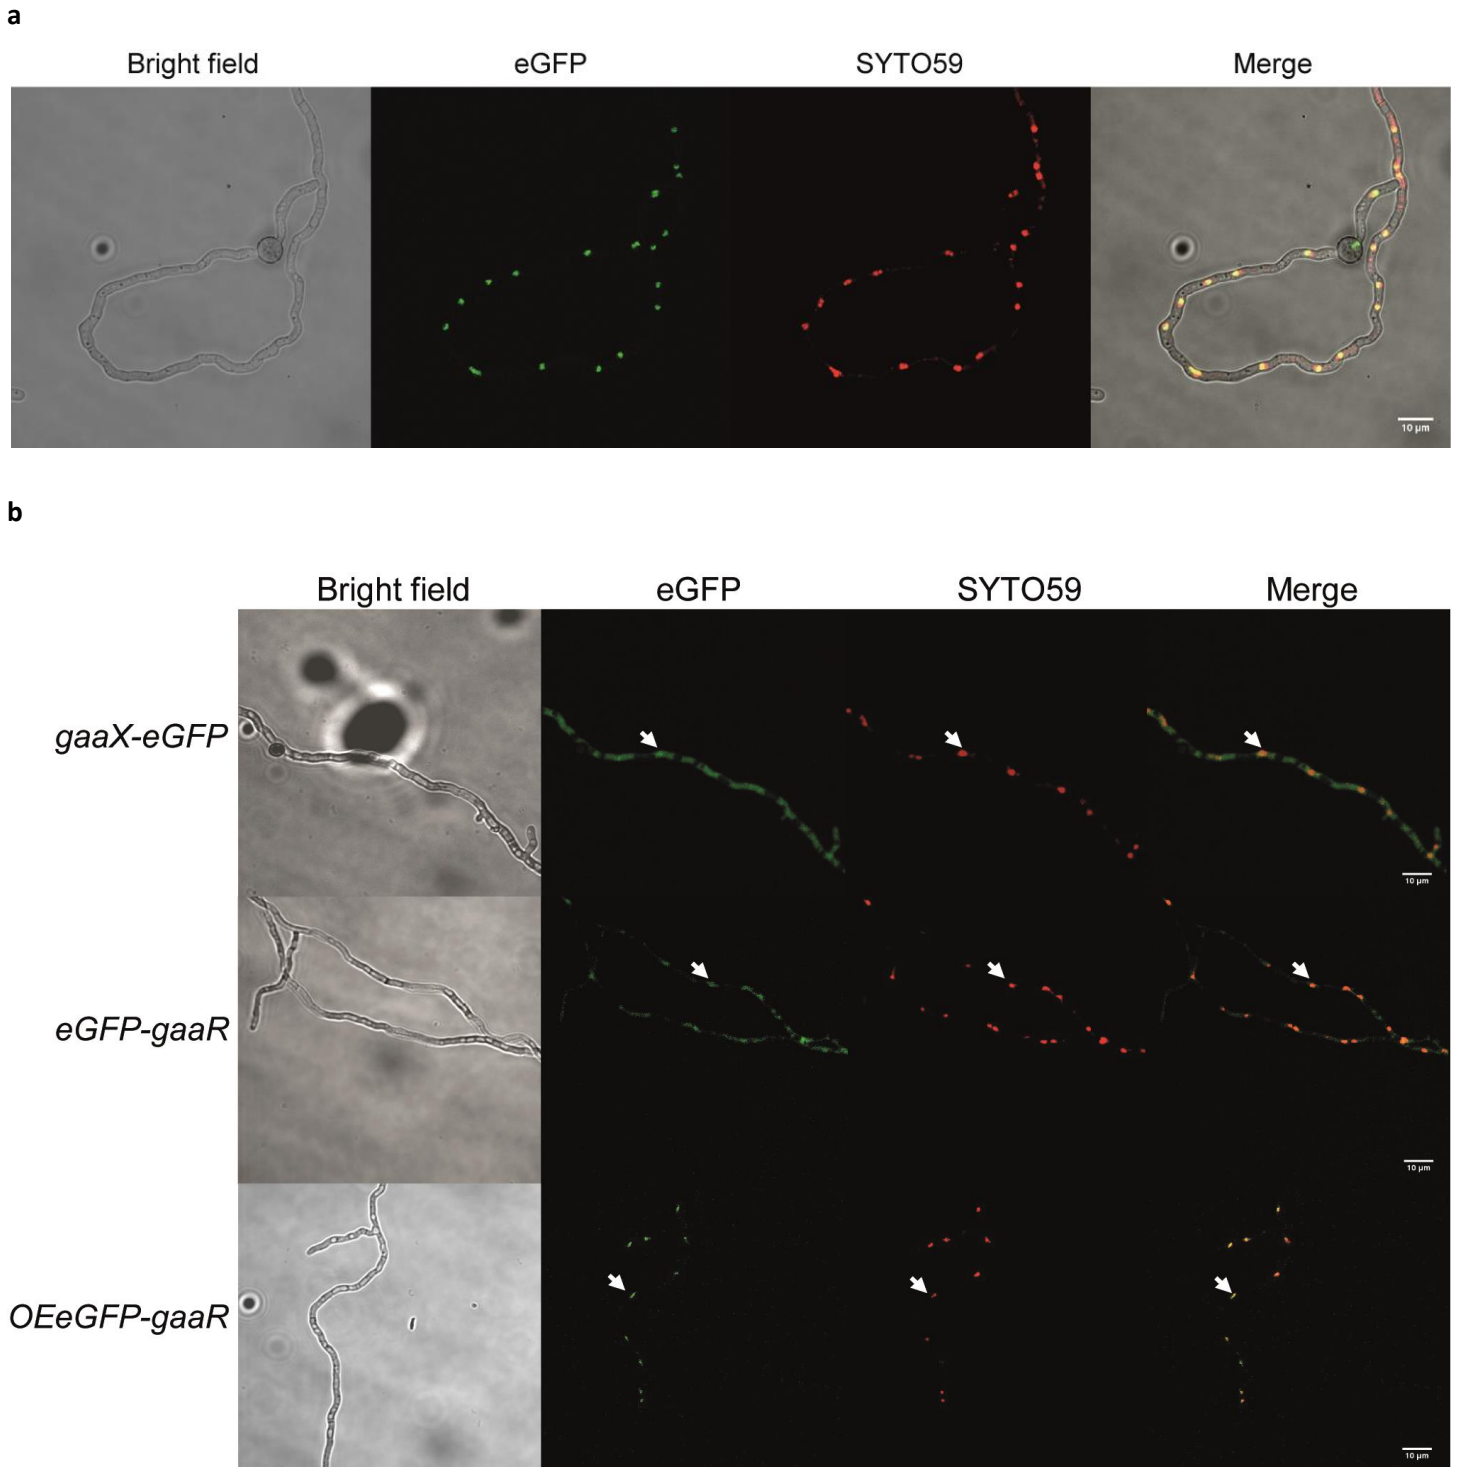

**Fig ESM\_3.4 a** Co-localization of the nuclear specific SYTO59 dye with the eGFP-tagged H2B protein. The MA26.1 strain was grown in MM containing 50 mM fructose for 16 h, and transferred to and grown in MM containing 50 mM GA for 1.5 h. **b** Co-localization of the nuclear specific SYTO59 dye with the eGFP-tagged GaaX and GaaR proteins. The *gaaX-eGFP* (JN126.2), *eGFP-gaaR* (EA19.2) and *OEEGFP-gaaR* (EA20.10) strains were grown in MM containing 10 mM GA for approximately 22 h. Positions of example nuclei were indicated with arrows. Scale bar: 10 µm



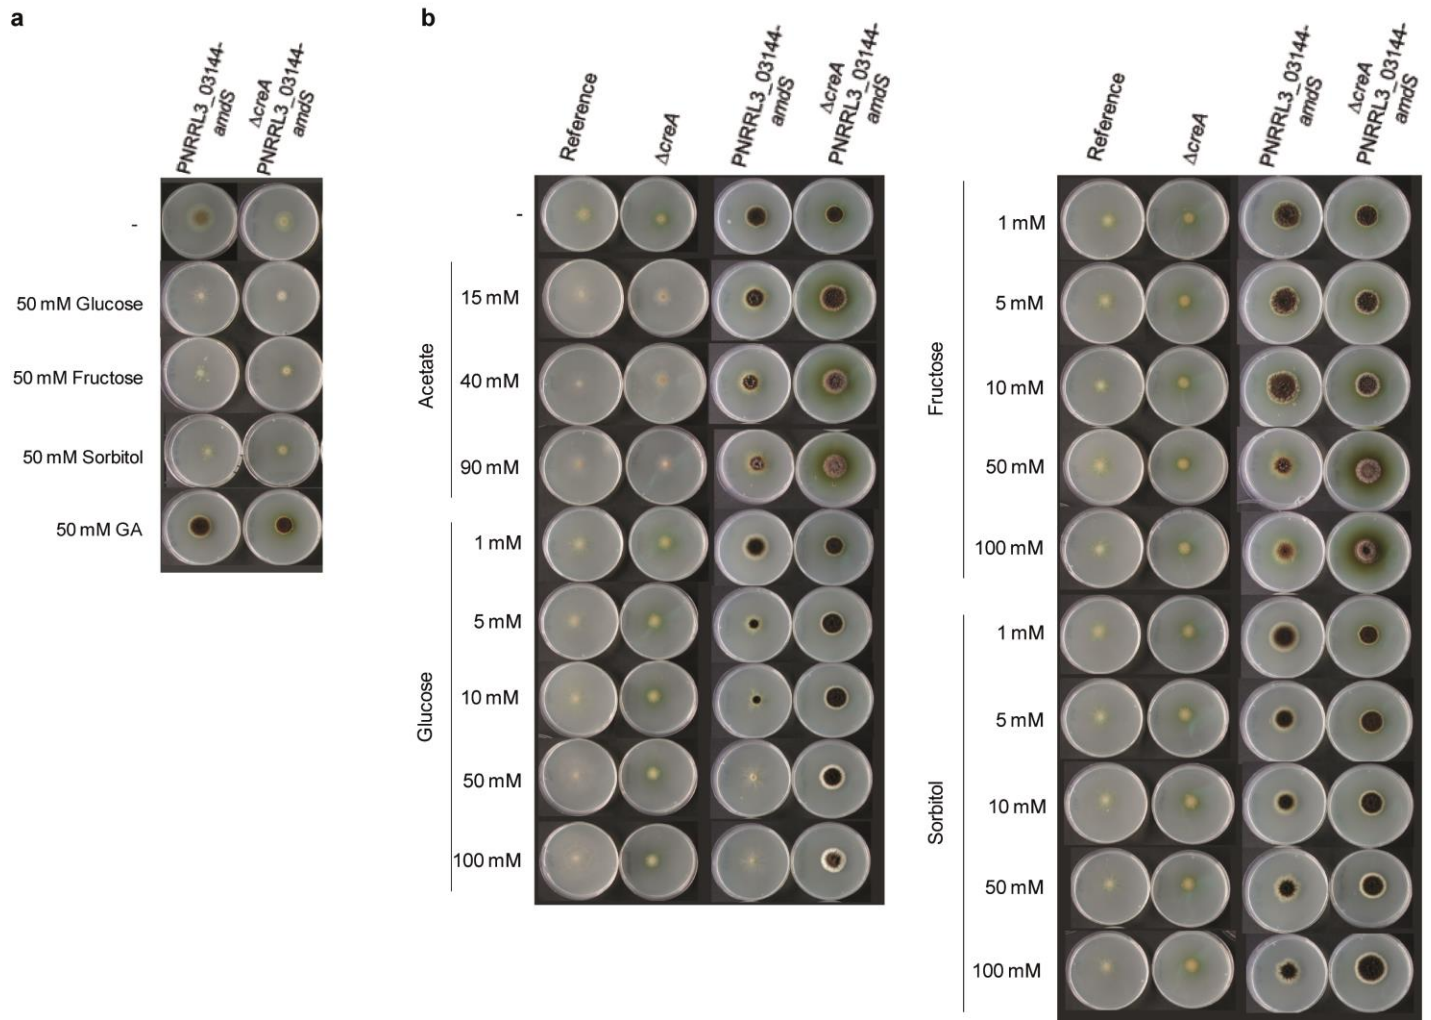

**Fig ESM\_3.5** Analysis of CreA-mediated carbon catabolite repression on exopolysaccharide encoding gene NRRL3\_03144. The reference (N402),  $\Delta creA$  (XY1.1), PNRRL3\_03144-amsD (JC1.5) and  $\Delta creA$  PNRRL3\_03144-amsD (JN29.2) strains were grown at 30 °C for 7 days on solid MM containing 50 mM glucose, fructose, sorbitol or GA as carbon source (a), or 50 mM GA with increasing amounts of acetate, glucose, fructose or sorbitol (b). All plates contain 10 mM acetamide as the sole nitrogen source. Concentration of carbon sources are indicated
